# Supplementary material for: A ZnIn2S4@ReS2/AgInS2-based photoelectrochemical aptasensor for the ultrasensitive detection of kanamycin
Source: Royal Society of Chemistry journal article supplement (doi:10.1039/d3cc05261c), 2023-01-01
Supplement: d3cc05261c1.pdf [file d3cc05261c1.pdf]

*Electronic Supplementary Information (ESI) for*  
**ZnIn<sub>2</sub>S<sub>4</sub>@ReS<sub>2</sub>/AgInS<sub>2</sub>-based photoelectrochemical aptasensor**  
**for the ultrasensitive detection of Kanamycin**

Xing-Pei Liu,<sup>a</sup> Yuan-Yuan Tang,<sup>a</sup> Jing-Shuai Chen,<sup>b</sup> Chang-Jie Mao<sup>\*a</sup> and Bao-Kang  
Jin<sup>b</sup>

<sup>a</sup> *Key Laboratory of Structure and Functional Regulation of Hybrid Materials (Ministry of Education), Key Laboratory of Chemistry for Inorganic/Organic Hybrid Functionalized Materials of Anhui Province, Key Laboratory of Functional Inorganic Materials of Anhui Province, School of Chemistry & Chemical Engineering, Anhui University, hefei 230601, PR China.*

<sup>b</sup> *School of Chemistry & Chemical Engineering, Anhui University, hefei 230601, PR China.*

---

\* Corresponding Authors: *Changjie Mao*

Tel: +86-551-63861260

E-mail address: [maochangjie@sina.com](mailto:maochangjie@sina.com) (Mao CJ)

## S1 Experimental Section

### S1.1 Materials

Sodium chloride (NaCl) was obtained from Damao Chemical Reagent Factory (Tianjin, China). Disodium phosphate ( $\text{Na}_2\text{HPO}_4$ ), L-ascorbic acid (AA), potassium ferricyanide ( $\text{K}_3\text{Fe}(\text{CN})_6$ ), potassium chloride (KCl), indium chloride tetrahydrate ( $\text{InCl}_3 \cdot 4\text{H}_2\text{O}$ ), indium nitrate ( $\text{In}(\text{NO}_3)_3$ ), 3-mercaptopropionic acid (MPA), thiourea and ethylene glycol (EG) were purchased from Macklin Biochemical Co., Ltd. (Shanghai, China). Potassium ferrocyanide trihydrate ( $\text{K}_4\text{Fe}(\text{CN})_6 \cdot 3\text{H}_2\text{O}$ ) was ordered from Guangfu Fine Chemical Research Institute (Tianjin, China). Sodium dihydrogen phosphate dihydrate ( $\text{NaH}_2\text{PO}_4 \cdot 2\text{H}_2\text{O}$ ), Zinc acetate dihydrate ( $\text{Zn}(\text{CH}_3\text{COO})_2 \cdot 2\text{H}_2\text{O}$ ), thioacetamide (TAA), silver nitrate ( $\text{AgNO}_3$ ) and sodium sulfite were provided by Sinopharm Chemical Reagent Co., Ltd. (Shanghai, China). Rhenium acid ammonium ( $\text{H}_4\text{NO}_4\text{Re}$ ) was purchased in Wengjiang Chemical Reagent Co., Ltd. (Guangdong). 6-Mercaptohexanol (MCH) was acquired from Energy Chemical Reagent Co., Ltd. (Shanghai, China). All of the chemicals were analytical grade and directly used without further purification. The DNA oligonucleotides were obtained from Sangon Biotechnology Co. Ltd. (Shanghai, China).

The nucleic acids sequences used in this work are shown below:

| Name             | Sequences (5' to 3')                                 |
|------------------|------------------------------------------------------|
| H-DNA            | SH-TTTTTTTCGGCTTGGGGGTTGAGGCTAAGCCGA-NH <sub>2</sub> |
| DNA <sub>2</sub> | TCGGCTTAGCCTCAACCCCA                                 |

### S1.2 Instrumentations

The PEC measurement and electrochemical impedance spectroscopy (EIS) were carried out on the CHI 660D electrochemical workstation (CH Instruments, China). The working system is a traditional three-electrode system, the modified FTO electrode was used as the working electrode, Ag/AgCl (saturated KCl) electrode is the reference electrode and the platinum wire electrode is the counter electrode. A full-

band xenon lamp (Nanjing Yan'an Special Lighting Factory, China) was used as the light source. The applied voltage is 0.0 V and the switching time interval is 20 s. Scanning electron microscope (SEM) images were carried out with S-4800 scanning electron microscope (Hitachi Ltd., Japan). Transmission electron microscopy (TEM) and high resolution transmission electron microscopy (HRTEM) images were carried out with JEM-2100 transmission electron microscopy (JEOL Ltd., Japan). X-ray photoelectron spectroscopy (XPS) was performed with an ES-CALAB 250 X-ray photoelectron spectroscopy (Thermo Ltd, USA). The ultraviolet-visible (UV-vis) absorption spectrum was recorded in the UV-3600 UV spectroscopy (Shimadzu Co., Ltd., Japan)

### **S1.3 Synthesis of ZnIn<sub>2</sub>S<sub>4</sub>, ReS<sub>2</sub> and ZnIn<sub>2</sub>S<sub>4</sub>/ReS<sub>2</sub> heterojunction**

Briefly, 0.2195 g Zn(CH<sub>3</sub>COO)<sub>2</sub>·2H<sub>2</sub>O and 0.5863 g InCl<sub>3</sub>·4H<sub>2</sub>O were dissolved in 60 mL ultrapure water, and then 0.4508 g TAA was added into the solution. After stirring for 30 min, the mixture was transferred into a 100 mL teflon-lined autoclave and maintained at 160°C for 12 h. The product was collected by centrifugation and then washed several times with ultrapure water and ethanol, and dried at 60°C for 12 h.

ReS<sub>2</sub> was synthesized by a simple one-step hydrothermal process. 0.1475 g H<sub>4</sub>NO<sub>4</sub>Re and 0.1890 g CH<sub>4</sub>N<sub>2</sub>S were added to 35 mL ultrapure water and magnetic stirred until dissolved completely. Subsequently, the above solution was then transferred into a 50 mL teflon-lined autoclave and heated at 200°C for 24 h.

The obtained ZnIn<sub>2</sub>S<sub>4</sub> and ReS<sub>2</sub> were dissolved in ultrapure water respectively for further use. Then, ZnIn<sub>2</sub>S<sub>4</sub> and ReS<sub>2</sub> were mixed at a ratio of 10:1. The obtained mixture was sonicated for 30 min and stirred overnight.

### **S1.4 Synthesis of AgInS<sub>2</sub> QDs**

0.1 mmol AgNO<sub>3</sub>, 0.4 mmol In(NO<sub>3</sub>)<sub>3</sub> and 50 mL ultrapure water were added into a clean three-neck flask successively. After stirring, 0.1 mmol of mercaptopropionic acid (MPA) was added into the mixture. The pH of the solution was adjusted to 9 with 1 M NaOH solution, the obtained solution was stirred under N<sub>2</sub> protection for 30 min. Finally, 0.6 mmol Na<sub>2</sub>S was added and reacted at 100°C for 2 h.

### **S1.5 Fabrication of PEC aptasensor**

Before construction of the PEC aptasensor, bare FTO electrode ( $0.45 \text{ cm}^2$ ) was washed thoroughly with ethanol and ultrapure water several times. After drying at  $60^\circ\text{C}$ ,  $30 \text{ }\mu\text{L}$  of  $\text{ZnIn}_2\text{S}_4/\text{ReS}_2$  heterojunction was dropped and dried at room temperature. In the meantime, the H-DNA was annealed at  $95^\circ\text{C}$  for 5 min and cooling down to the room temperature. Then, the annealed H-DNA ( $300 \text{ }\mu\text{L}$ ,  $1 \text{ }\mu\text{M}$ ) was activated with TCEP ( $3 \text{ }\mu\text{L}$ ,  $1.2 \text{ mM}$ ) for 30 min before use. Whereafter,  $30 \text{ }\mu\text{L}$  of pretreated H-DNA ( $1 \text{ }\mu\text{M}$ ) was incubated on the electrode surface overnight to acquire H-DNA/ $\text{ZnIn}_2\text{S}_4/\text{ReS}_2/\text{FTO}$ . After that, MCH was modified to block the nonspecific binding sites. Afterwards,  $30 \text{ }\mu\text{L}$  of  $\text{AgInS}_2$  preactivated with EDC and NHS was modified on the terminal of H-DNA to form the sensitization structure. Whereafter,  $30 \text{ }\mu\text{L}$  of  $\text{DNA}_2$  was incubated on the above electrode, the H-DNA changed into a double-stranded structure. Finally, Kana with different concentrations were incubated through specific recognition with H-DNA.

### **S1.6 Photoelectrochemical and EIS test**

The photoelectrochemical test of this experiment was carried out in  $0.1 \text{ M}$  PBS buffer ( $\text{pH } 7.4$ ) containing  $0.1 \text{ M}$  ascorbic acid (AA), in which AA was present as an electron donor. In the test, the light source was  $250 \text{ W}$  xenon lamp, the wavelength range was  $280\sim 1000 \text{ nm}$ . The switching frequency of the light source was once every  $20 \text{ s}$ , and the applied voltage was  $0.0 \text{ V}$ . The photocurrent is generated when an external light source hits the electrode surface.

Electrochemical impedance spectroscopy (EIS) was carried out with CHI 660D electrochemical workstation (CH Instruments, China) using a traditional three-electrode system, the modified FTO electrode as the working electrode,  $\text{Ag}/\text{AgCl}$  (saturated  $\text{KCl}$ ) electrode was the reference electrode and the platinum wire electrode was the counter electrode. The electrolyte was  $0.01 \text{ M}$  of PBS ( $\text{pH } 7.4$ ) including  $0.1 \text{ M}$  of  $\text{KCl}$  and  $2 \text{ mM}$  of  $\text{K}_3[\text{Fe}(\text{CN})_6]/\text{K}_4[\text{Fe}(\text{CN})_6]$  ( $1:1$ ), the frequency was ranged from  $100 \text{ mHz}$  to  $100 \text{ KHz}$ , and the amplitude was  $5 \text{ mV}$ . The working electrodes at different modified processes as follows:

(a)  $\text{ZnIn}_2\text{S}_4/\text{ReS}_2/\text{FTO}$ ,

- (b) H-DNA/ZnIn<sub>2</sub>S<sub>4</sub>/ReS<sub>2</sub>/FTO,
- (c) MCH/H-DNA/ZnIn<sub>2</sub>S<sub>4</sub>/ReS<sub>2</sub>/FTO,
- (d) AgInS<sub>2</sub>/MCH/H-DNA/ZnIn<sub>2</sub>S<sub>4</sub>/ReS<sub>2</sub>/FTO,
- (e) DNA<sub>2</sub>/AgInS<sub>2</sub>/MCH/H-DNA/ZnIn<sub>2</sub>S<sub>4</sub>/ReS<sub>2</sub>/FTO,
- (f) Kana/AgInS<sub>2</sub>/MCH/H-DNA/ZnIn<sub>2</sub>S<sub>4</sub>/ReS<sub>2</sub>/FTO.

## S2 Result and discussion

### S2.1 The characterization of ZnIn<sub>2</sub>S<sub>4</sub>, ReS<sub>2</sub> and ZnIn<sub>2</sub>S<sub>4</sub>/ReS<sub>2</sub> and AgInS<sub>2</sub>

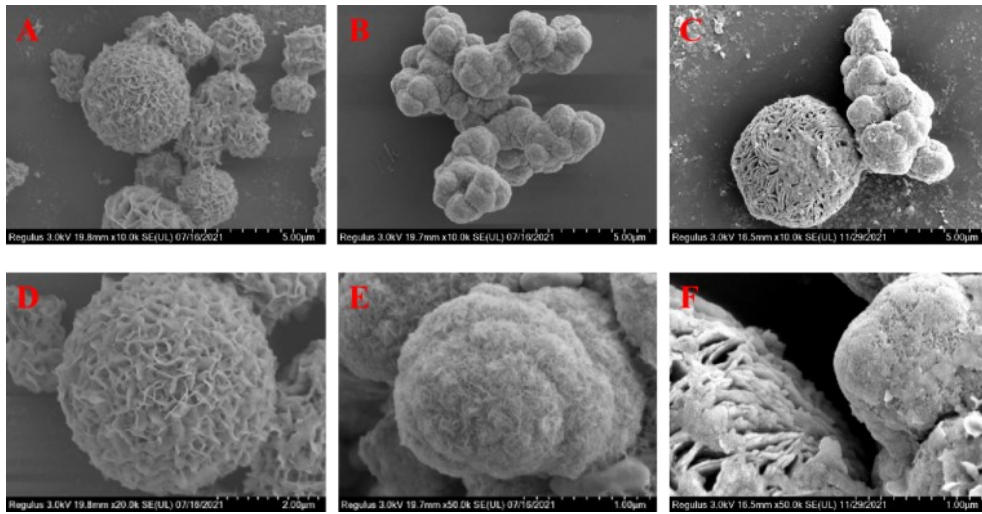

**Fig. S1** SEM images of ZnIn<sub>2</sub>S<sub>4</sub> (A) and (D); ReS<sub>2</sub> (B) and (E); ZnIn<sub>2</sub>S<sub>4</sub>/ReS<sub>2</sub> (C) and (F).

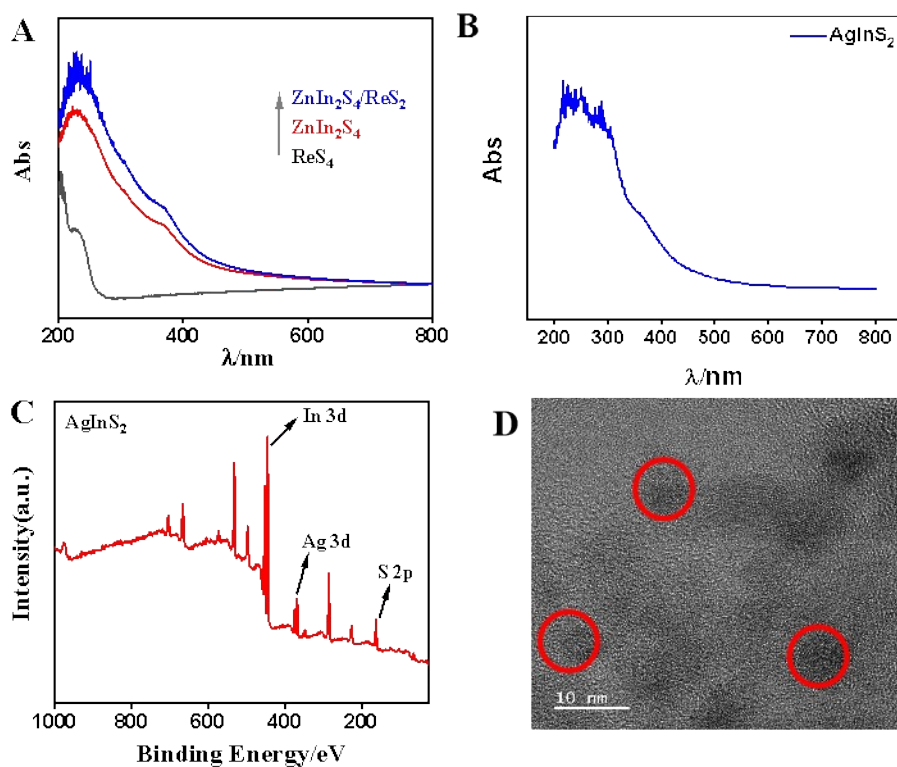

**Fig. S2** UV-vis absorbance spectrum of (A)  $\text{ZnIn}_2\text{S}_4$ ,  $\text{ReS}_2$  and  $\text{ZnIn}_2\text{S}_4/\text{ReS}_2$ , UV-vis absorbance spectrum (B), XPS survey spectrum (C) and HR-TEM image (D) of  $\text{AgInS}_2$ .

## S2.2 Optimization of experimental conditions

In order to acquire better PEC performances, the ratio of  $\text{ZnIn}_2\text{S}_4$  and  $\text{CdSe}$ , the incubation time of H-DNA and  $\text{AgInS}_2$ ,  $\text{DNA}_2$  and H-DNA, Kana and H-DNA were optimized. As shown in Fig. 5A, the optimal ratio of  $\text{ReS}_2$  was 10%, and the photocurrent response was  $40 \mu\text{A}$ . After the aptasensor electrode was modified with H-DNA and MCH, the photocurrent decreased significantly. For the purpose of improving the detection sensitivity,  $\text{AgInS}_2$  was introduced to amplify the signal response. The incubation time of  $\text{AgInS}_2$  was a significant factor affecting the amplification effect. As shown in Fig. 5B, the photocurrent response under different incubation time of  $\text{AgInS}_2$  was distinct and the optimal incubation time was 1 h. After  $\text{DNA}_2$  was modified, the photocurrent decreased and finally stabilized at 20 min because of the saturation of  $\text{DNA}_2$  (Fig. 5C). Finally, because of the conformational change of H-DNA resulted from the specific recognition between H-DNA and Kana,  $\text{AgInS}_2$  was closer to the electrode surface, an increased photocurrent response

obtained. Therefore, the optimal incubation time of H-DNA and Kana ( $1 \times 10^{-7}$  M) were 30 min (Fig. 5D).

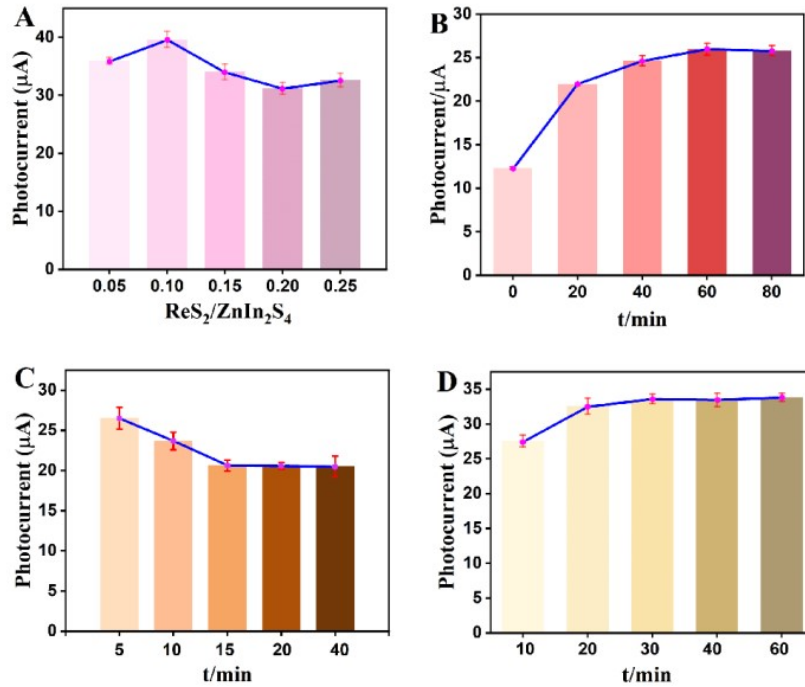

**Fig. S3** (A) Optimization of  $\text{ReS}_2$  proportion; Optimization of reaction time of (B)  $\text{AgInS}_2$  and aptamer DNA, (C)  $\text{DNA}_2$  with aptamer DNA, (D) kana with aptamer DNA.

### S2.3 The calculation of LOD.

The LOD was calculated according to  $3\sigma/S$ , where  $\sigma$  was the standard deviation of three independently blank samples response and the  $S$  was the slope of the analytical curve.

### S2.4 Comparison with other detection methods.

**Table S1.** Comparison with other detection methods.

| Detection method | Detection range ( $\mu\text{M}$ )     | Minimum detection line ( $\mu\text{M}$ ) | Reference |
|------------------|---------------------------------------|------------------------------------------|-----------|
| Fluorescence     | $4 \times 10^{-3} - 8 \times 10^{-2}$ | $5.2 \times 10^{-4}$                     | [1]       |
| Fluorescence     | $2 \times 10^{-2} - 1$                | $1.46 \times 10^{-2}$                    | [2]       |
| Colorimetric     | $2.5 \times 10^{-2} - 0.8$            | $2.058 \times 10^{-2}$                   | [3]       |
| Colorimetric     | $1 \times 10^{-5} - 5 \times 10^{-2}$ | $0.9 \times 10^{-5}$                     | [4]       |

|                          |                           |                        |              |
|--------------------------|---------------------------|------------------------|--------------|
| Electrochemiluminescence | $1.0 \times 10^{-3}$ -100 | $7.98 \times 10^{-4}$  | [5]          |
| Electrochemiluminescence | $1 \times 10^{-3}$ -10    | $2.8 \times 10^{-4}$   | [6]          |
| Microbial acoustic       | /                         | 4                      | [7]          |
| Photoelectrochemical     | $1-1 \times 10^{-3}$      | $1.27 \times 10^{-4}$  | [8]          |
| Photoelectrochemical     | $1.0 \times 10^{-5}$ -0.1 | $0.708 \times 10^{-5}$ | This working |

## S2.5 Detection of Kana in actual sample.

**Table S2.** Detection of Kana in milk samples.

| Sample | Added ( $10^{-10}$ M) | Found ( $10^{-10}$ M) | Recovery (%) | RSD (% , n=3) |
|--------|-----------------------|-----------------------|--------------|---------------|
| Milk1  | 5                     | 5.257                 | 105.14       | 1.77          |
| Milk2  | 50                    | 46.881                | 93.76        | 0.19          |
| Milk3  | 500                   | 457.09                | 91.42        | 1.42          |

## References

- 1 W. L. Cui, G. D. Hu, E. G. Lv, C. H. Li, Z. X. Wang, Q. Li, Z. H. Qian, J. H. Wang, S. C. Xu, R. Wang, *Food Control.*, 2022, **133**, 108654.
- 2 S. S. Liu, Y. M. Chen, Z. J. Ruan, J. Q. Lin, W. Kong, *Environ. Res.*, 2022, **206**, 112617.
- 3 X. Y. Qi, Y. L. Zhao, H. P. Su, L. L. Wang, L. Li, R. Ma, X. C. Yan, J. A. Sun, S. Wang, X. Z. Mao, *Talanta*, 2022, **238**, 123032.
- 4 T. T. Zhao, Q. Chen, Y. L. Wen, X. J. Bian, Q. Tao, G. Liu, J. Yan, *Food Chem.*,



2022, **377**, 132072.

- 5 X. P. Liu, J. L. Cheng, C. J. Mao, M. Z. Wu, J. S. Chen, B. K. Jin, *Microchem. J.*, 2022, **172**, 106928.
- 6 N. Zhang, X. T. Wang, Z. P. Xiong, L. Y. Huang, Y. Jin, A. J. Wang, P. X. Yuan, Y. B. He, J. J. Feng, *Anal. Chem.*, 2021, **93**, 17110-17118.
- 7 O. I. Guliy, B. D. Zaitsev, A. P. Semyonov, A. K. M. Alsowaidi, A. A. Teplykh, O. A. Karavaeva, I. A. Borodina, *Ultrasonics.*, 2022, **120**, 106651.
- 8 W. X. Dong, Z. P. Li, W. Wen, S. S. Feng, Y. J. Zhang, G. M. Wen, *RSC Adv.*, 2021, **11**, 28320-28325.
